# Supplementary material for: Intrinsic and Extrinsic Charge Transport in CH3NH3PbI3 Perovskites Predicted from First-Principles
Source: PubMed Central journal article supplement (PMC4731798; doi:10.1038/srep19968), 2016-01-29
Supplement: srep19968-s1.pdf [file srep19968-s1.pdf]

## Supplementary Information

Intrinsic and Extrinsic Charge Transport in  $\text{CH}_3\text{NH}_3\text{PbI}_3$  Perovskites Predicted from First-Principles

Tianqi Zhao,<sup>1</sup> Wen Shi,<sup>1</sup> Jinyang Xi,<sup>1</sup> Dong Wang,<sup>\*1</sup> Zhigang Shuai<sup>\*1,2,3</sup>

<sup>1</sup>MOE Key Laboratory of Organic OptoElectronics and Molecular Engineering, Department of Chemistry, Tsinghua University, Beijing 100084, P. R. China

<sup>2</sup>Key Laboratory of Organic Solids, Beijing National Laboratory for Molecular Science (BNLMS), Institute of Chemistry, Chinese Academy of Sciences, Beijing 100190, P. R. China

<sup>3</sup>Collaborative Innovation Center of Chemistry for Energy Materials, Xiamen University, 351005 Xiamen, China

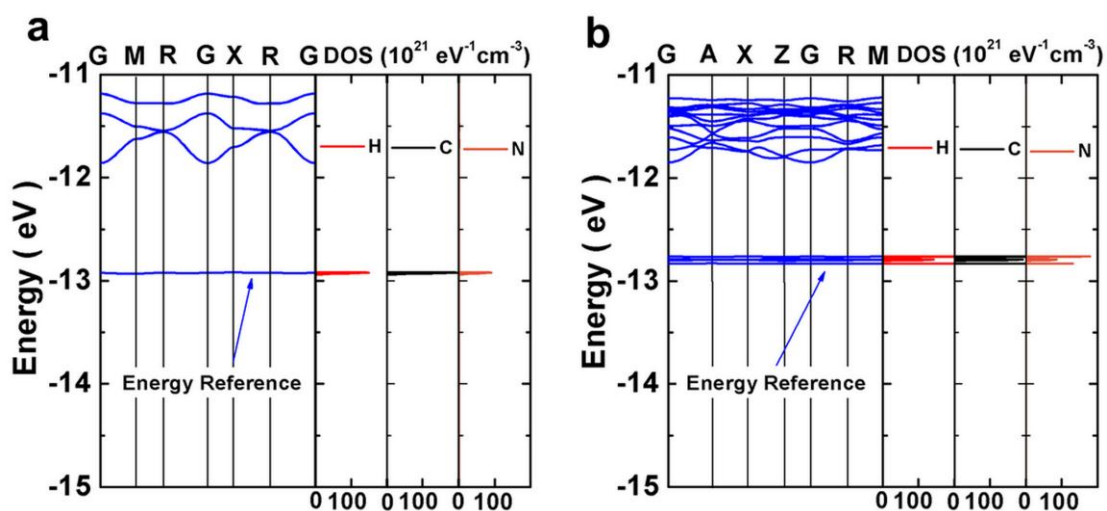

Supplementary Figure S1. Energy reference for the VBM and CBM calibration during straining of cubic (a) and tetragonal (b)  $\text{CH}_3\text{NH}_3\text{PbI}_3$ .

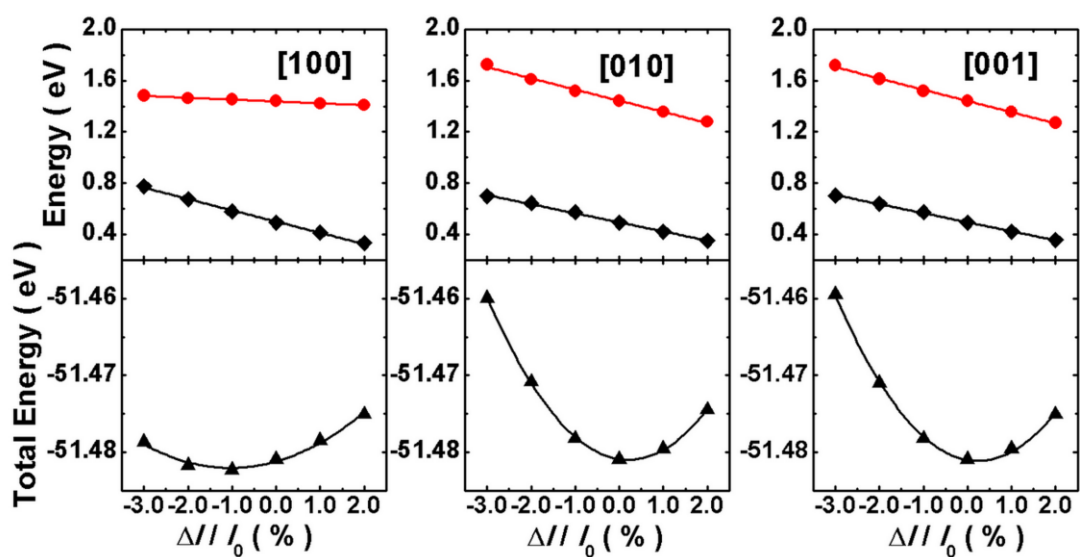

Supplementary Figure S2. Energy shift of the CBM and VBM with respect to dilation (upper panel) and total energy change with dilation (lower panel) along [100], [010] and [001] directions for cubic  $\text{CH}_3\text{NH}_3\text{PbI}_3$ .

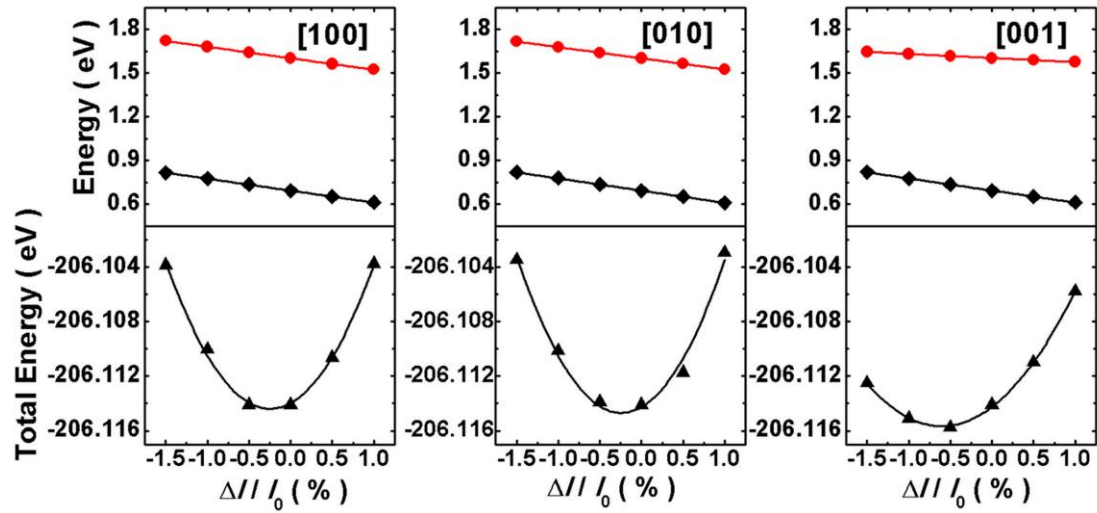

Supplementary Figure S3. Energy shift of the CBM and VBM with respect to dilation (upper panel) and total energy change with dilation (lower panel) along [100], [010] and [001] directions for tetragonal  $\text{CH}_3\text{NH}_3\text{PbI}_3$ .

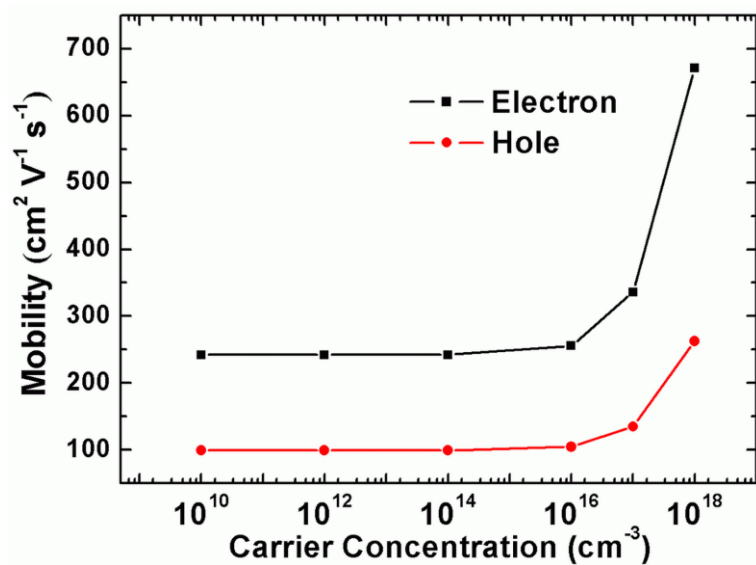

Supplementary Figure S4. Mobility of tetragonal  $\text{CH}_3\text{NH}_3\text{PbI}_3$  perovskites limited by charged impurity scattering as a function of free carrier concentration at an impurity density of  $10^{18} \text{ cm}^{-3}$ .

Supplementary Table S1. Structural parameters of cubic and tetragonal CH<sub>3</sub>NH<sub>3</sub>PbI<sub>3</sub>.

|            |                    | <i>a</i><br>(Å) | <i>b</i><br>(Å) | <i>c</i><br>(Å) | <i>α</i> | <i>β</i> | <i>γ</i> |
|------------|--------------------|-----------------|-----------------|-----------------|----------|----------|----------|
| Cubic      | Calc.              | 6.67            | 6.44            | 6.44            | 89.76    | 90.02    | 90.02    |
|            | Expt. <sup>a</sup> | 6.31            | 6.31            | 6.32            | 90.0     | 90.0     | 90.0     |
| Tetragonal | Calc.              | 9.11            | 9.07            | 12.91           | 90.25    | 89.25    | 88.32    |
|            | Expt. <sup>a</sup> | 8.85            | 8.85            | 12.64           | 90.0     | 90.0     | 90.0     |

<sup>a</sup>Ref. S1.

Supplementary Table S2. Effective mass  $m^*/m_e$  of electrons and holes in cubic and tetragonal CH<sub>3</sub>NH<sub>3</sub>PbI<sub>3</sub>. 1 and 2 represent bands with opposite spins.

|            |     | VB(2) | VB(1) | CB(1) | CB(2) |
|------------|-----|-------|-------|-------|-------|
| Cubic      | R-M | 0.60  | 0.28  | 0.16  | 0.30  |
|            | R-G | 0.52  | 0.26  | 0.17  | 0.28  |
|            | R-X | 0.55  | 0.31  | 0.18  | 0.32  |
| Tetragonal | G-M | 0.52  | 0.28  | 0.15  | 0.23  |
|            | G-Z | 0.45  | 0.43  | 0.26  | 0.27  |
|            | G-X | 0.31  | 0.24  | 0.16  | 0.20  |
|            | G-A | 0.50  | 0.28  | 0.15  | 0.24  |
|            | G-R | 0.36  | 0.26  | 0.17  | 0.23  |

Supplementary Table S3. Relaxation times of electrons and holes in cubic and tetragonal  $\text{CH}_3\text{NH}_3\text{PbI}_3$  subject to impurity and acoustic phonon scatterings at 300 K. The impurity density is taken as  $10^{16}$ ,  $10^{17}$  and  $10^{18} \text{ cm}^{-3}$  respectively. The free carrier concentration is  $10^{14} \text{ cm}^{-3}$ .

|                     | $\tau$<br>(ps)            | Cubic    |       | Tetragonal |       |
|---------------------|---------------------------|----------|-------|------------|-------|
|                     |                           | Electron | Hole  | Electron   | Hole  |
| Ionized<br>Impurity | $10^{18} \text{ cm}^{-3}$ | 0.017    | 0.019 | 0.016      | 0.018 |
|                     | $10^{17} \text{ cm}^{-3}$ | 0.17     | 0.19  | 0.16       | 0.18  |
|                     | $10^{16} \text{ cm}^{-3}$ | 1.67     | 1.95  | 1.59       | 1.83  |
| Total               | $10^{18} \text{ cm}^{-3}$ | 0.011    | 0.017 | 0.013      | 0.017 |
|                     | $10^{17} \text{ cm}^{-3}$ | 0.042    | 0.10  | 0.065      | 0.13  |
|                     | $10^{16} \text{ cm}^{-3}$ | 0.082    | 0.30  | 0.16       | 0.51  |

Supplementary Table S4. Mobilities of electrons and holes in cubic  $\text{CH}_3\text{NH}_3\text{PbI}_3$  subject to impurity and acoustic phonon scatterings at 300 K. The impurity density is taken as  $10^{16}$ ,  $10^{17}$  and  $10^{18} \text{ cm}^{-3}$  respectively. The free carrier concentration is  $10^{14} \text{ cm}^{-3}$ .

|                     | $\mu$<br>( $\text{cm}^2 \text{ V}^{-1} \text{ s}^{-1}$ ) | electron |          |          | hole     |          |          |
|---------------------|----------------------------------------------------------|----------|----------|----------|----------|----------|----------|
|                     |                                                          | <i>a</i> | <i>b</i> | <i>c</i> | <i>a</i> | <i>b</i> | <i>c</i> |
| Ionized<br>Impurity | $10^{18} \text{ cm}^{-3}$                                | 288      | 172      | 172      | 88.7     | 151      | 151      |
|                     | $10^{17} \text{ cm}^{-3}$                                | 2878     | 1716     | 1718     | 887      | 1506     | 1506     |
|                     | $10^{16} \text{ cm}^{-3}$                                | 28781    | 17157    | 17175    | 8871     | 15062    | 15065    |
| Total               | $10^{18} \text{ cm}^{-3}$                                | 164      | 101      | 101      | 72.2     | 119      | 119      |
|                     | $10^{17} \text{ cm}^{-3}$                                | 473      | 303      | 303      | 377      | 592      | 591      |
|                     | $10^{16} \text{ cm}^{-3}$                                | 708      | 476      | 476      | 927      | 1399     | 1399     |

Supplementary Table S5. Mobilities of electrons and holes in tetragonal  $\text{CH}_3\text{NH}_3\text{PbI}_3$  subject to impurity and acoustic phonon scatterings at 300 K. The impurity density is taken as  $10^{16}$ ,  $10^{17}$  and  $10^{18} \text{ cm}^{-3}$  respectively. The free carrier concentration is  $10^{14} \text{ cm}^{-3}$ .

|                     | $\mu$<br>( $\text{cm}^2 \text{ V}^{-1} \text{ s}^{-1}$ ) | electron |          |          | hole     |          |          |
|---------------------|----------------------------------------------------------|----------|----------|----------|----------|----------|----------|
|                     |                                                          | <i>a</i> | <i>b</i> | <i>c</i> | <i>a</i> | <i>b</i> | <i>c</i> |
| Ionized<br>Impurity | $10^{18} \text{ cm}^{-3}$                                | 184      | 185      | 242      | 158      | 161      | 99.2     |
|                     | $10^{17} \text{ cm}^{-3}$                                | 1844     | 1853     | 2423     | 1577     | 1613     | 992      |
|                     | $10^{16} \text{ cm}^{-3}$                                | 18442    | 18534    | 24228    | 15768    | 16132    | 9918     |
| Total               | $10^{18} \text{ cm}^{-3}$                                | 139      | 139      | 178      | 142      | 145      | 90.2     |
|                     | $10^{17} \text{ cm}^{-3}$                                | 590      | 585      | 711      | 930      | 949      | 605      |
|                     | $10^{16} \text{ cm}^{-3}$                                | 1294     | 1261     | 1365     | 3086     | 3150     | 2050     |

#### Supplementary References

- S1. Stoumpos, C. C., Malliakas, C. D. & Kanatzidis, M. G. Semiconducting tin and lead iodide perovskites with organic cations: Phase transitions, high mobilities, and near-infrared photoluminescent properties. *Inorg. Chem.* **52**, 9019-9038 (2013).
